# Supplementary material for: Effects of Organic Acids on the Release of Fruity Esters in Water: An Insight at the Molecular Level
Source: MDPI journal article supplement (doi:10.3390/molecules27092942), 2022-05-04
Supplement: s1 [file s1]

**Table S1.** Partition coefficient of six esters in different matrix ( $k \times 100$ )

| <b>Esters<br/>Matrix</b> | <b>C2C3</b> | <b>2MeC3C2</b> | <b>C4C2</b> | <b>C2C4</b> | <b>3MeC4C2</b> | <b>C5C2</b> |
|--------------------------|-------------|----------------|-------------|-------------|----------------|-------------|
| Water                    | 1.30±0.00   | 3.91±0.11      | 2.51±0.13   | 2.14±0.20   | 8.88±0.02      | 4.67±0.15   |
| 1 g/L CA                 | 1.13±0.02   | 3.60±0.13      | 2.23±0.04   | 1.97±0.03   | 9.09±0.04      | 3.34±0.11   |
| 2.5 g/L CA               | 1.23±0.00   | 3.44±0.08      | 2.55±0.02   | 1.96±0.12   | 9.79±0.04      | 3.70±0.15   |
| 5 g/L CA                 | 1.27±0.02   | 3.61±0.00      | 2.62±0.03   | 2.15±0.11   | 10.99±0.06     | 4.30±0.17   |
| 1 g/L MA                 | 1.23±0.00   | 3.86±0.01      | 2.32±0.06   | 2.15±0.08   | 8.45±0.03      | 3.96±0.02   |
| 2.5 g/L MA               | 1.25±0.02   | 3.90±0.09      | 2.39±0.14   | 2.31±0.11   | 10.28±0.10     | 4.28±0.01   |
| 5 g/L MA                 | 1.28±0.02   | 3.45±0.15      | 2.41±0.05   | 2.40±0.06   | 11.26±0.10     | 4.60±0.00   |
| 1 g/L LA                 | 1.07±0.03   | 3.10±0.11      | 2.77±0.04   | 2.01±0.08   | 8.37±0.03      | 3.97±0.03   |
| 2.5 g/L LA               | 1.17±0.02   | 3.16±0.11      | 3.05±0.05   | 1.96±0.06   | 8.20±0.02      | 3.86±0.02   |
| 5 g/L LA                 | 1.18±0.00   | 3.00±0.04      | 2.84±0.02   | 1.75±0.07   | 7.98±0.05      | 3.69±0.02   |

**Table S2.** The interaction mode between citric acid and esters

| <b>Esters</b> | <b>Hydrogen bonds</b> | <b>Free CA</b> | <b>Steric hindrance</b> | <b>Ternary ring structure</b> |
|---------------|-----------------------|----------------|-------------------------|-------------------------------|
| C2C3          | 2                     | 2              | —                       | —                             |
| 2MeC3C2       | 2                     | —              | Y <sup>1</sup>          | Y                             |
| C4C2          | 3                     | —              | —                       | Y                             |
| C2C4          | 2                     | —              | —                       | Y                             |
| 3MeC4C2       | 2                     | —              | Y                       | Y                             |
| C5C2          | 4                     | —              | —                       | —                             |

<sup>1</sup> The Y means the type of this interaction exists between esters and CA

**Table S3.** The interaction mode between lactic acid and esters

| <b>Esters</b> | <b>Hydrogen bonds</b> | <b>Free CA</b> | <b>Steric hindrance</b> | <b>Ternary ring structure</b> |
|---------------|-----------------------|----------------|-------------------------|-------------------------------|
| C2C3          | 1                     | 1              | —                       | —                             |
| 2MeC3C2       | 2                     | —              | —                       | Y                             |
| C4C2          | —                     | —              | —                       | —                             |
| C2C4          | 2                     | —              | Y <sup>1</sup>          | —                             |
| 3MeC4C2       | 1                     | —              | —                       | —                             |
| C5C2          | 2                     | —              | —                       | —                             |

<sup>1</sup> The Y means the type of this interaction exists between esters and CA

**Table S4.** The interaction mode between lactic acid and esters

| Esters  | Hydrogen bonds | Free CA | Steric hindrance | Ternary ring structure |
|---------|----------------|---------|------------------|------------------------|
| C2C3    | 2              | 2       | —                | —                      |
| 2MeC3C2 | 3              | —       | Y                | Y                      |
| C4C2    | 2              | 1       | —                | —                      |
| C2C4    | 1              | —       | —                | —                      |
| 3MeC4C2 | 2              | —       | Y                | —                      |
| C5C2    | 2              | —       | —                | Y                      |

<sup>1</sup> The Y means the type of this interaction exists between esters and CA
